# Supplementary material
Source: publisher figshare collection journal article supplement (https://frontiersin.figshare.com/ndownloader/files/25874877)
Supplement: Supplementary file 1 [file 25874877]

## Sheet: data
Fieldtag	RMNH voucher	Collection Date	Collection Site	Lat,Long	Collection Depth	Sponge species	Genbank accession number Sponge 28S ribosomal RNA	Symbiont species	Genbank accession number Symbiodiniaceae ITS2
ZOO_134	RMNH.POR.11772	2018-05-09	Kapoposang	-4.692143,118.942592	Unknown	Cliona aff. orientalis RMNH.POR.11772	MT756898	Cladocopium sp. (ITS2 C1*)	MT756891
ZOO_015	RMNH.POR.11773	2018-04-20	Samalona	-5.121818,119.340525	Shallow reef flat	Cliona sp. RMNH.POR.11773	MT756899
ZOO_090	RMNH.POR.11774	2018-05-05	Bone Lola	-5.051700,119.353875	6	Cliona sp. RMNH.POR.11774	MT756900
ZOO_013	RMNH.POR.11775	2018-04-22	Badi	-4.971699,119.283078	Shallow reef flat	Cliona thomasi	MT756901	Cladocopium sp. (ITS2 C1*)	MT756869
ZOO_065	RMNH.POR.11776	2018-04-26	Lumulumu	-4.975217,119.207950	19.8	Cliona thomasi	MT756903	Cladocopium sp. (ITS2 C1*)	MT756880
ZOO_039	RMNH.POR.11777	2018-04-23	Kudingareng Keke	-5.103492,119.284610	10	Cliona thomasi	MT756902	Cladocopium sp. (ITS2 C1*)	MT756874
ZOO_060	RMNH.POR.11778	2018-04-26	Lumulumu	-4.975217,119.207950	6.5	Cliona utricularis	MT756904
ZOO_126	RMNH.POR.11779	2018-05-08	Kapoposang	-4.692143,118.942592	4.8	Cliona utricularis	MT756905
ZOO_005	RMNH.POR.11780	2018-04-21	Langkai	-5.028175,119.090362	Shallow reef flat	Spheciospongia digitata	MT756906	Durusdinium sp. (ITS2 D8)	MT756868
ZOO_018	RMNH.POR.11781	2018-04-21	Langkai	-5.028175,119.090362	Shallow reef flat	Spheciospongia digitata	MT756907	Durusdinium sp. (ITS2 D8)	MT756870
ZOO_073	RMNH.POR.11782	2018-04-26	Lumulumu	-4.975217,119.207950	Shallow reef flat	Spheciospongia digitata	MT756908
ZOO_074	RMNH.POR.11783	2018-04-26	Lumulumu	-4.975217,119.207950	Shallow reef flat	Spheciospongia digitata	MT756909	Durusdinium sp. (ITS2 D8)	MT756882
ZOO_079	RMNH.POR.11784	2018-05-05	Lae Lae	-5.136833,119.388055	Shallow reef flat	Spheciospongia digitata	MT756910	Freudenthalidium sp. (ITS2 F3.1)	MT756883
ZOO_080	RMNH.POR.11785	2018-05-05	Lae Lae	-5.136833,119.388055	Shallow reef flat	Spheciospongia digitata	MT756911	Freudenthalidium sp. (ITS2 F3.1)	MT756884
ZOO_088	RMNH.POR.11786	2018-05-05	Lae Lae	-5.136833,119.388055	Shallow reef flat	Spheciospongia digitata	MT756912	Durusdinium sp. (ITS2 D8)	MT756885
ZOO_089	RMNH.POR.11787	2018-05-05	Lae Lae	-5.136833,119.388055	Shallow reef flat	Spheciospongia digitata	MT756913	Durusdinium sp. (ITS2 D8)	MT756886
ZOO_304	RMNH.POR.11788	2018-04-30	Barang Lompo	-5.041694,119.326417	Shallow reef flat	Spheciospongia digitata	MT756914	Durusdinium sp. (ITS2 D8)	MT756892
ZOO_316	RMNH.POR.11789	2018-04-30	Barang Caddi	-5.078018,119.316899	Shallow reef flat	Spheciospongia digitata	MT756915	Durusdinium sp. (ITS2 D8)	MT756895
ZOO_317	RMNH.POR.11790	2018-04-30	Barang Caddi	-5.078018,119.316899	Shallow reef flat	Spheciospongia digitata	MT756916	Durusdinium sp. (ITS2 D8)	MT756896
ZOO_319	RMNH.POR.11791	2018-04-30	Barang Caddi	-5.078018,119.316899	Shallow reef flat	Spheciospongia digitata	MT756917	Durusdinium sp. (ITS2 D8)	MT756897
ZOO_003	RMNH.POR.11792	2018-04-21	Langkai	-5.028175,119.090362	Shallow reef flat	Spheciospongia maeandrina	MT756918	Cladocopium sp. (ITS2 C1*)	MT756867
ZOO_022	RMNH.POR.11793	2018-04-21	Langkai	-5.028175,119.090362	Shallow reef flat	Spheciospongia maeandrina	MT756919	Cladocopium sp. (ITS2 C1*)	MT756871
ZOO_035	RMNH.POR.11794	2018-04-22	Badi	-4.971699,119.283078	Shallow reef flat	Spheciospongia maeandrina	MT756920	Cladocopium sp. (ITS2 C1*)	MT756872
ZOO_037	RMNH.POR.11795	2018-04-22	Badi	-4.971699,119.283078	Shallow reef flat	Spheciospongia maeandrina	MT756921	Cladocopium sp. (ITS2 C1*)	MT756873
ZOO_041	RMNH.POR.11796	2018-04-23	Kudingareng Keke	-5.103492,119.284610	Shallow reef flat	Spheciospongia maeandrina	MT756922	Cladocopium sp. (ITS2 C1*)	MT756875
ZOO_043	RMNH.POR.11797	2018-04-23	Kudingareng Keke	-5.103492,119.284610	Shallow reef flat	Spheciospongia maeandrina	MT756923	Cladocopium sp. (ITS2 C1*)	MT756876
ZOO_048	RMNH.POR.11798	2018-04-24	Polewali	-4.845450,119.401233	Shallow reef flat	Spheciospongia maeandrina	MT756924	Cladocopium sp. (ITS2 C1*)	MT756877
ZOO_050	RMNH.POR.11799	2018-05-07	Pajenekang	-4.971361,119.322194	Shallow reef flat	Spheciospongia maeandrina	MT756925	Cladocopium sp. (ITS2 C1*)	MT756878
ZOO_051	RMNH.POR.11800	2018-05-07	Pajenekang	-4.971361,119.322194	Shallow reef flat	Spheciospongia maeandrina	MT756926	Cladocopium sp. (ITS2 C1*)	MT756879
ZOO_062	RMNH.POR.12367	2018-04-27	Karangan	-4.857051,119.384393	Shallow reef flat	Spheciospongia maeandrina	MT756927
ZOO_072	RMNH.POR.12368	2018-04-26	Lumulumu	-4.975217,119.207950	Shallow reef flat	Spheciospongia maeandrina	MT756928	Cladocopium sp. (ITS2 C1*)	MT756881
ZOO_115	RMNH.POR.12369	2018-05-06	Lankadea	-4.925097,119.391704	Shallow reef flat	Spheciospongia maeandrina	MT756929	Cladocopium sp. (ITS2 C1*)	MT756887
ZOO_127	RMNH.POR.12370	2018-05-09	Kapoposang	-4.692143,118.942592	Shallow reef flat	Spheciospongia maeandrina	MT756930	Cladocopium sp. (ITS2 C1*)	MT756888
ZOO_132	RMNH.POR.12371	2018-05-09	Kapoposang	-4.692143,118.942592	Shallow reef flat	Spheciospongia maeandrina	MT756931	Cladocopium sp. (ITS2 C1*)	MT756889
ZOO_133	RMNH.POR.12372	2018-05-09	Kapoposang	-4.692143,118.942592	Shallow reef flat	Spheciospongia maeandrina	MT756932	Cladocopium sp. (ITS2 C1*)	MT756890
ZOO_305	RMNH.POR.12373	2018-04-30	Barang Lompo	-5.041694,119.326417	Shallow reef flat	Spheciospongia maeandrina	MT756933	Cladocopium sp. (ITS2 C1*)	MT756893
ZOO_306	RMNH.POR.12374	2018-04-30	Barang Lompo	-5.041694,119.326417	Shallow reef flat	Spheciospongia maeandrina	MT756934	Cladocopium sp. (ITS2 C1*)	MT756894
CEL_160	RMNH.POR.12375	2018-04-29	Barang Barangan	-5.074183,119.422367	Unknown	Spheciospongia trincomaliensis	MT756935
CEL_162	RMNH.POR.12376	2018-04-29	Barang Barangan	-5.074183,119.422367	Unknown	Spheciospongia trincomaliensis	MT756936
ZOO_004	RMNH.POR.12377	2018-04-26	Lumulumu	-4.975217,119.207950	11.3	Spheciospongia trincomaliensis	MT756937
ZOO_010	RMNH.POR.12378	2018-04-29	Barang Barangan	-5.074183,119.422367	6.7	Spheciospongia trincomaliensis	MT756938
ZOO_019	RMNH.POR.12379	2018-04-22	Badi	-4.971699,119.283078	13	Spheciospongia trincomaliensis	MT756939
ZOO_027	RMNH.POR.12380	2018-04-29	Barang Barangan	-5.074183,119.422367	7.2	Spheciospongia trincomaliensis	MT756940
ZOO_028	RMNH.POR.12381	2018-04-22	Badi	-4.971699,119.283078	9.1	Spheciospongia trincomaliensis	MT756941
ZOO_031	RMNH.POR.12382	2018-04-29	Barang Barangan	-5.074183,119.422367	6.7	Spheciospongia trincomaliensis	MT756942
ZOO_033	RMNH.POR.12383	2018-04-22	Badi	-4.971699,119.283078	10.1	Spheciospongia trincomaliensis	MT756943
ZOO_036	RMNH.POR.12384	2018-04-22	Badi	-4.971699,119.283078	11.1	Spheciospongia trincomaliensis	MT756944
ZOO_052	RMNH.POR.12385	2018-04-24	Polewali	-4.845450,119.401233	10.8	Spheciospongia trincomaliensis	MT756945
ZOO_067	RMNH.POR.12386	2018-04-28	Samalona	-5.121818,119.340525	14	Spheciospongia trincomaliensis	MT756946
ZOO_069	RMNH.POR.12387	2018-04-28	Samalona	-5.121818,119.340525	13.7	Spheciospongia trincomaliensis	MT756947
ZOO_070	RMNH.POR.12388	2018-04-28	Samalona	-5.121818,119.340525	12.5	Spheciospongia trincomaliensis	MT756948
ZOO_075	RMNH.POR.12389	2018-05-05	Lae Lae	-5.136833,119.388055	8.3	Spheciospongia trincomaliensis	MT756949
ZOO_078	RMNH.POR.12390	2018-05-05	Lae Lae	-5.136833,119.388055	6.6	Spheciospongia trincomaliensis	MT756950
ZOO_084	RMNH.POR.12391	2018-05-05	Lae Lae	-5.136833,119.388055	7	Spheciospongia trincomaliensis	MT756951
ZOO_085	RMNH.POR.12392	2018-05-05	Bone Lola	-5.051700,119.353875	13.4	Spheciospongia trincomaliensis	MT756952
ZOO_086	RMNH.POR.12393	2018-05-05	Bone Lola	-5.051700,119.353875	10.6	Spheciospongia trincomaliensis	MT756953
ZOO_092	RMNH.POR.12394	2018-04-28	Samalona	-5.121818,119.340525	12.5	Spheciospongia trincomaliensis	MT756954
ZOO_099	RMNH.POR.12395	2018-04-28	Samalona	-5.121818,119.340525	12.5	Spheciospongia trincomaliensis	MT756955
ZOO_103	RMNH.POR.12396	2018-05-07	Pajenekang	-4.971361,119.322194	7.1	Spheciospongia trincomaliensis	MT756956
ZOO_104	RMNH.POR.12397	2018-05-07	Pajenekang	-4.971361,119.322194	13.6	Spheciospongia trincomaliensis	MT756957
ZOO_106	RMNH.POR.12398	2018-05-07	Pajenekang	-4.971361,119.322194	13.8	Spheciospongia trincomaliensis	MT756958
ZOO_111	RMNH.POR.12399	2018-05-08	Kapoposang	-4.692143,118.942592	12.2	Spheciospongia trincomaliensis	MT756959
ZOO_113	RMNH.POR.12400	2018-05-08	Kapoposang	-4.692143,118.942592	8.8	Spheciospongia trincomaliensis	MT756960
ZOO_119	RMNH.POR.12421	2018-05-08	Kapoposang	-4.692143,118.942592	15.6	Spheciospongia trincomaliensis	MT756961
ZOO_120	RMNH.POR.12422	2018-05-08	Kapoposang	-4.692143,118.942592	18.3	Spheciospongia trincomaliensis	MT756962
ZOO_121	RMNH.POR.12423	2018-05-06	Lankadea	-4.925097,119.391704	11.3	Spheciospongia trincomaliensis	MT756963
ZOO_123	RMNH.POR.12424	2018-05-06	Lankadea	-4.925097,119.391704	11.5	Spheciospongia trincomaliensis	MT756964
ZOO_124	RMNH.POR.12425	2018-05-06	Lankadea	-4.925097,119.391704	9.2	Spheciospongia trincomaliensis	MT756965
ZOO_131	RMNH.POR.12426	2018-05-08	Kapoposang	-4.692143,118.942592	7	Spheciospongia trincomaliensis	MT756966
ZOO_135	RMNH.POR.12427	2018-05-10	Kudingareng Keke	-5.103492,119.284610	12.8	Spheciospongia trincomaliensis	MT756967
ZOO_136	RMNH.POR.12428	2018-05-12	Langkai	-5.028175,119.090362	Unknown	Spheciospongia trincomaliensis	MT756968
ZOO_137	RMNH.POR.12429	2018-05-12	Langkai	-5.028175,119.090362	Unknown	Spheciospongia trincomaliensis	MT756969
ZOO_138	RMNH.POR.12430	2018-05-12	Langkai	-5.028175,119.090362	Unknown	Spheciospongia trincomaliensis	MT756970
ZOO_139	RMNH.POR.12431	2018-05-12	Langkai	-5.028175,119.090362	Unknown	Spheciospongia trincomaliensis	MT756971
ZOO_140	RMNH.POR.12432	2018-05-13	Bone Baku	-5.131786,119.361213	13.4	Spheciospongia trincomaliensis	MT756972
ZOO_049	RMNH.POR.12433	2018-04-24	Polewali	-4.845450,119.401233	11.2	Spheciospongia trincomaliensis
ZOO_082	RMNH.POR.12434	2018-05-05	Bone Lola	-5.051700,119.353875	11.9	Spheciospongia trincomaliensis
ZOO_083	RMNH.POR.12435	2018-05-05	Lae Lae	-5.136833,119.388055	5.7	Spheciospongia trincomaliensis
ZOO_076	RMNH.POR.12436	2018-05-05	Lae Lae	-5.136833,119.388055	8.1	Spheciospongia trincomaliensis
ZOO_112	RMNH.POR.12437	2018-05-06	Lankadea	-4.925097,119.391704	Shallow reef flat	Spheciospongia maeandrina
ZOO_128	RMNH.POR.12438	2018-05-09	Kapoposang	-4.692143,118.942592	Shallow reef flat	Spheciospongia maeandrina
ZOO_094	RMNH.POR.12439	2018-04-28	Samalona	-5.121818,119.340525	16.4	Cliona aff. thomasi
ZOO_021	RMNH.POR.12440	2018-04-23	Kudingareng Keke	-5.103492,119.284610	8.4	Cliona aff. thomasi
ZOO_114	RMNH.POR.12441	2018-05-06	Lankadea	-4.925097,119.391704	Shallow reef flat	Spheciospongia maeandrina
ZOO_071	RMNH.POR.12442	2018-04-26	Lumulumu	-4.975217,119.207950	Shallow reef flat	Spheciospongia maeandrina
ZOO_053	RMNH.POR.12443	2018-04-24	Polewali	-4.845450,119.401233	Shallow reef flat	Spheciospongia maeandrina
ZOO_011	RMNH.POR.12444	2018-04-22	Badi	-4.971699,119.283078	Shallow reef flat	Spheciospongia maeandrina
ZOO_001	RMNH.POR.12445	2018-04-22	Badi	-4.971699,119.283078	Shallow reef flat	Cliona aff. thomasi
ZOO_040	RMNH.POR.12446	2018-04-22	Badi	-4.971699,119.283078	Shallow reef flat	Spheciospongia digitata
ZOO_339	RMNH.POR.12447	2018-05-11	Barang Caddi	-5.078018,119.316899	Shallow reef flat	Spheciospongia digitata
ZOO_081	RMNH.POR.12448	2018-05-05	Lae Lae	-5.136833,119.388055	Shallow reef flat	Spheciospongia digitata
ZOO_061	RMNH.POR.12449	2018-04-27	Karangan	-4.857051,119.384393	Shallow reef flat	Spheciospongia digitata
